# Supplementary material for: Prevalence of Food Insecurity Among HIV-Positive Smokers in Vietnam
Source: PubMed Central journal article supplement — Tob Use Insights. 2024 Dec 6;17:1179173X241297804. doi: 10.1177/1179173X241297804 (PMC11624529; doi:10.1177/1179173x241297804), 2024-12-06
Supplement: sj-pdf-1-tui-10.1177_1179173X241297804.pdf [file sj-pdf-1-tui-10.1177_1179173X241297804.pdf]

**BASELINE PATIENT SURVEY**

Name of OPC: .....

ID:

|  |  |  |
|--|--|--|
|  |  |  |
|--|--|--|

District: .....

Name of interviewer: .....

Date of Interview: ...../...../.....

Starting time: .....hour .....minute

|                                                                                                                    |                                                                                                                                                                                                                                                                                                                                                                                                                          |  |
|--------------------------------------------------------------------------------------------------------------------|--------------------------------------------------------------------------------------------------------------------------------------------------------------------------------------------------------------------------------------------------------------------------------------------------------------------------------------------------------------------------------------------------------------------------|--|
| What is patient's gender?                                                                                          | Male ..... 1<br>Female ..... 2                                                                                                                                                                                                                                                                                                                                                                                           |  |
| What is your age?<br><b>(LESS THAN 18 NOT ELIGIBLE)</b>                                                            | ..... Years                                                                                                                                                                                                                                                                                                                                                                                                              |  |
| What is the highest level of education you have achieved?                                                          | No schooling ..... 1<br>Primary school (Grade 1-5) ..... 2<br>Secondary school (Grade 6-9) ..... 3<br>High school (Grade 10-12) ..... 4<br>Vocational training/College ..... 5<br>University ..... 6<br>Graduate ..... 7                                                                                                                                                                                                 |  |
| What is your marital status?                                                                                       | Single/Never married ..... 1<br>Married ..... 2<br>Divorced ..... 3<br>Separated ..... 4<br>Widowed ..... 5<br>Other (Specify): ..... 6                                                                                                                                                                                                                                                                                  |  |
| Who do you live with?<br>(Multiple choices)                                                                        | I live alone ..... 0<br>Spouse/Partner ..... 1<br>Children under the age of 18 ..... 2<br>Children over 18 or older ..... 3<br>Other adults over age 18 ..... 4                                                                                                                                                                                                                                                          |  |
| What is your current <b>main</b> job?                                                                              | Farmer (farming, livestock, cultivation)/<br>Fishermen ..... 1<br>Officers and employees (state, locality) ..... 2<br>Working for non-state agencies (including<br>workers) ..... 3<br>Small business/Craft/Trading/Services (tailor,<br>hairdresser, mason)/Freelance ..... 4<br>Business ..... 5<br>Homemaker ..... 6<br>Student/Pupil ..... 7<br>Retired ..... 8<br>Unemployment ..... 9<br>Other (Specify): ..... 99 |  |
| What was your total household income during the past 12 months?<br><br><b>(Total income of every family member</b> | <2,000,000 ..... 1<br>2,000,000 - <10,000,000 ..... 2<br>10,000,000 - <50,000,000 ..... 3<br>50,000,000 - <100,000,000 ..... 4                                                                                                                                                                                                                                                                                           |  |

|                                                                                                                                        |                                                                                           |  |
|----------------------------------------------------------------------------------------------------------------------------------------|-------------------------------------------------------------------------------------------|--|
| <b>calculated in VND)</b>                                                                                                              | 100,000,000 - 300,000,000 ..... 5<br>More than 300,000,000 ..... 6<br>Do not know ..... 8 |  |
| Do you currently smoke cigarettes every day, or some days, ?                                                                           | Every day ..... 1<br>Some days ..... 2                                                    |  |
| How soon after you wake up do you smoke your first cigarettes?                                                                         | 5 min or less ..... 1<br>6–30 min ..... 2<br>31–60 min ..... 3<br>61 min or more ..... 0  |  |
| Do you find it difficult to refrain from smoking in places where it is forbidden? (e.g, in hospital, school, workplace, theater, etc.) | Yes ..... 1<br>No ..... 0                                                                 |  |
| Which cigarette would you hate most to give up?                                                                                        | The first one in the morning ..... 1<br>All others ..... 2                                |  |
| Do you smoke more frequently during the first hours after waking than during the rest of the day?                                      | Yes ..... 1<br>No ..... 0                                                                 |  |
| Do you smoke when you are so ill that you are in bed most of the day?                                                                  | Yes ..... 1<br>No ..... 0                                                                 |  |

|                                                                                                                                                             |                                                                                                                                                                                                                                               |                |
|-------------------------------------------------------------------------------------------------------------------------------------------------------------|-----------------------------------------------------------------------------------------------------------------------------------------------------------------------------------------------------------------------------------------------|----------------|
| When was the last time you stopped smoking cigarettes for 24 hours or longer because you were trying to quit?                                               | Never tried to quit before ..... 0<br>Within the last month ..... 1<br>1-6 months ago ..... 2<br>7-12 months ago ..... 3<br>More than a year ago ..... 4<br>Don't know/don't remember ..... 8                                                 |                |
| Please indicate which statement best describes what you think about quitting cigarettes?<br><b>READ EACH ANSWER</b>                                         | I am thinking about (or planning to) quit within the next 30 days ..... 1<br>I am thinking about (or planning to) quit within the next 6 months ..... 2<br>I am not planning to (or intending to) quit ..... 3<br>I am trying to quit ..... 4 |                |
| Have you ever smoked a waterpipe?                                                                                                                           | Yes ..... 1<br>No ..... 2                                                                                                                                                                                                                     | <b>2 → B28</b> |
| How soon after you wake up do you smoke your first water pipe?                                                                                              | 5 min or less ..... 1<br>6–30 min ..... 2<br>31–60 min ..... 3<br>61 min or more ..... 4                                                                                                                                                      |                |
| Do you find it difficult to refrain from smoking in places where there is no available waterpipe, you cannot bring waterpipe, and/or smoking is forbidden ? | Yes ..... 1<br>No ..... 0                                                                                                                                                                                                                     |                |

|                                                                                                                            |                                                                                                                                                                                                                                               |  |
|----------------------------------------------------------------------------------------------------------------------------|-----------------------------------------------------------------------------------------------------------------------------------------------------------------------------------------------------------------------------------------------|--|
| When would you hate most to give up smoking waterpipe?                                                                     | The first one in the morning..... 1<br>All others ..... 2                                                                                                                                                                                     |  |
| Do you smoke waterpipe more frequently during the first hours after waking than during the rest of the day?                | Yes..... 1<br>No..... 0                                                                                                                                                                                                                       |  |
| Do you smoke waterpipe when you are so ill that you are in bed most of the day?                                            | Yes..... 1<br>No..... 0                                                                                                                                                                                                                       |  |
| Please indicate which statement best describes what you think about quitting smoking waterpipe?<br><b>READ EACH ANSWER</b> | I am thinking about (or planning to) quit within the next 30 days ..... 1<br>I am thinking about (or planning to) quit within the next 6 months ..... 2<br>I am not planning to (or intending to) quit ..... 3<br>I am trying to quit ..... 4 |  |

**DRUG USE CONSUMPTION**

| Drug list                                                                              | a. Marijuana<br>a/bhang/<br>K2/<br>hashish/<br>Other       | b. Cocaine                                                 | c. Heroin                                                  | d. Amphetamines/M<br>ethamphetamine<br>(meth,<br>blue, ice,<br>crystal) | e. Glue                                                    | f. Ecstasy/<br>molly<br>(MDMA)                             | g. Opium                                                   | h. Other                                                                            |
|----------------------------------------------------------------------------------------|------------------------------------------------------------|------------------------------------------------------------|------------------------------------------------------------|-------------------------------------------------------------------------|------------------------------------------------------------|------------------------------------------------------------|------------------------------------------------------------|-------------------------------------------------------------------------------------|
| In your life, which of the following substances have you <u>ever</u> used? (read list) | Yes ....1<br>No .....0<br>Don't remember..3<br>Refused...4              | Yes ....1<br>No .....0<br>Don't remember..3<br>Refused...4 | Yes ....1<br>No .....0<br>Don't remember..3<br>Refused...4 | Yes ....1<br>No .....0<br>Don't remember..3<br>Refused...4 | Yes ....1<br>Name of drug____<br>—<br>No .....0<br>Don't remember..3<br>Refused...4 |
| In the <u>past three months</u> , have you used the substances you mentioned?          | Yes ....1<br>No .....0<br>Don't remember..3<br>Refused...4              | Yes ....1<br>No .....0<br>Don't remember..3<br>Refused...4 | Yes ....1<br>No .....0<br>Don't remember..3<br>Refused...4 | Yes ....1<br>No .....0<br>Don't remember..3<br>Refused...4 | Yes ....1<br>No .....0<br>Don't remember..3<br>Refused...4                          |

**FOOD SECURITY**

For each of the following questions, consider what has happened *in the past 4 weeks*. For the questions “how often”, the answer “Rarely” means 1-2 times, “Sometimes” means 3-10 times and “Often” more than 10 times in the past 4 weeks

**Using Showcard**

|     |                                                                                                                                                                                  |                                                                                                                                                                                    |         |
|-----|----------------------------------------------------------------------------------------------------------------------------------------------------------------------------------|------------------------------------------------------------------------------------------------------------------------------------------------------------------------------------|---------|
| 1a. | In the past four weeks, did you worry that your household would not have enough food?                                                                                            | No .....0<br>Yes..... 1                                                                                                                                                            | 0 ➔ L2a |
| 1b. | How often did this happen?                                                                                                                                                       | Rarely (once or twice in the past four weeks) .....1<br>Sometimes (three to ten times in the past four weeks) .....2<br>Often (more than ten times in the past four weeks) ..... 3 |         |
| 2a. | In the past four weeks, were you or any household member not able to eat the kinds of foods you preferred because of a lack of resources?                                        | No .....0<br>Yes..... 1                                                                                                                                                            | 0 ➔ L3a |
| 2.b | How often did this happen?                                                                                                                                                       | Rarely (once or twice in the past four weeks) .....1<br>Sometimes (three to ten times in the past four weeks) .....2<br>Often (more than ten times in the past four weeks) ..... 3 |         |
| 3a. | In the past four weeks, did you or any household member have to eat a limited variety of foods due to a lack of resources?                                                       | No .....0<br>Yes..... 1                                                                                                                                                            | 0 ➔ L4a |
| 3b. | How often did this happen?                                                                                                                                                       | Rarely (once or twice in the past four weeks) .....1<br>Sometimes (three to ten times in the past four weeks) .....2<br>Often (more than ten times in the past four weeks) ..... 3 |         |
| 4a. | In the past four weeks, did you or any household member have to eat some foods that you really did not want to eat because of a lack of resources to obtain other types of food? | No .....0<br>Yes..... 1                                                                                                                                                            | 0 ➔ L5a |
| 4.b | How often did this happen?                                                                                                                                                       | Rarely (once or twice in the past four weeks) .....1<br>Sometimes (three to ten times in the past four weeks) .....2<br>Often (more than ten times in the past four weeks) 3       |         |
| 5a. | In the past four weeks, did you or any household member have to eat a smaller meal than you felt you needed because there was not enough food?                                   | No .....0<br>Yes 1                                                                                                                                                                 | 0 ➔ L6a |
| 5b. | How often did this happen?                                                                                                                                                       | Rarely (once or twice in the past four weeks) .....1<br>Sometimes (three to ten times in the past four weeks) .....2<br>Often (more than ten times in the past four weeks) 3       |         |
| 6a. | In the past four weeks, did you or any other                                                                                                                                     | No .....0<br>Yes 1                                                                                                                                                                 | 0 ➔     |

|     |                                                                                                                                             |                                                                                                                                                                              |                        |
|-----|---------------------------------------------------------------------------------------------------------------------------------------------|------------------------------------------------------------------------------------------------------------------------------------------------------------------------------|------------------------|
|     | household member have to eat fewer meals in a day because there was not enough food?                                                        |                                                                                                                                                                              | <b>L7a</b>             |
| 6b. | How often did this happen?                                                                                                                  | Rarely (once or twice in the past four weeks) .....1<br>Sometimes (three to ten times in the past four weeks) .....2<br>Often (more than ten times in the past four weeks) 3 |                        |
| 7a. | In the past four weeks, was there ever no food to eat of any kind in your household because of lack of resources to get food?               | No .....0<br>Yes .....1                                                                                                                                                      | <b>0</b><br><b>L8a</b> |
| 7b. | How often did this happen?                                                                                                                  | Rarely (once or twice in the past four weeks) .....1<br>Sometimes (three to ten times in the past four weeks) .....2<br>Often (more than ten times in the past four weeks) 3 |                        |
| 8a. | In the past four weeks, did you or any household member go to sleep at night hungry because there was not enough food?                      | No .....0<br>Yes .....1                                                                                                                                                      | <b>0</b><br><b>L9a</b> |
| 8b. | How often did this happen?                                                                                                                  | Rarely (once or twice in the past four weeks) .....1<br>Sometimes (three to ten times in the past four weeks) .....2<br>Often (more than ten times in the past four weeks) 3 |                        |
| 9A. | In the past four weeks, did you or any household member go a whole day and night without eating anything because there was not enough food? | No .....0<br>Yes .....1                                                                                                                                                      |                        |
| 9B  | How often did this happen?                                                                                                                  | Rarely (once or twice in the past four weeks) .....1<br>Sometimes (three to ten times in the past four weeks) .....2<br>Often (more than ten times in the past four weeks) 3 |                        |

| <b>HIV RELATED QUESTIONS</b> |                                                      |                                                 |                            |
|------------------------------|------------------------------------------------------|-------------------------------------------------|----------------------------|
|                              | What was the year you were diagnosed with HIV?       | ____/____/____                                  |                            |
|                              | Are you taking antiretroviral medicine for your HIV? | Yes ..... 1<br>No ..... 2<br>Don't know ..... 8 | <b>2 or 8</b><br><b>N1</b> |
